# Supplementary material for: Hepatitis C Viral NS3-4A Protease Activity Is Enhanced by the NS3 Helicase
Source: PubMed Central journal article supplement — J Biol Chem. 2008 Oct 31;283(44):29929–37. doi: 10.1074/jbc.M804065200 (PMC2573085; doi:10.1074/jbc.m804065200), 2008-10-31
Supplement: M804065200_1.pdf [file M804065200_1.pdf]

Supplementary Table 1

NS3 1a-1: 5' CCG CTC GAG GCG CCC ATC ACG GCG TAC GC 3'

NS3 1a-2: 5' CGC GGA TCC TTA CGT GAC GAC CTC CAG GTC G 3'

NS4A(1a) beta BamHI 5' GGA TCC TCA GCA CTC TTC CAT CTC ATC GAA 3'

NS3 1a-3: 5' GGC AAG GCT ATC CCC CTC GAA GTG ATC AAG GGG GGA 3'

NS3 1a-4: 5' TCC CCC CTT GAT CAC TTC GAG GGG GAT AGC CTT GCC 3'

NS3 alpha XhoI 5' CCG CTC GAG GCG CCT ATT ACG GCC TAC 3'

NS3 beta BamHI 5' CGC GGA TCC TTA GGT GAC GAC TTC CAG GTC GG 3'

NS4A beta BamHI 5'CG GGA TCC TTA GCA TTC TTC CAT TTC ATC GAA CT 3'

NS3(1a) 5' SUMO start: 5' TCA GCG CCC ATC ACG GCG TAC G 3'

NS3(1b) 5' SUMO start: 5' TCC GCG CCT ATT ACG GCC TAC TC 3'

NS4A 1a SUMO start : 5' AGC ACC TGG GTG CTC GTT G 3'

NS4A 1a SUMO end: 5' TCA GCA CTC TTC CAT CTC ATC GAA 3'

NS3prot(1a)-1: 5' CCG GTG TTC ACG GAC AAC TGA TCC TCT CCA CCA GCA  
GTG 3'

NS3prot(1a)-2 : 5' CAC TGC TGG TGG AGA GGA TCA GTT GTC CGT GAA CAC  
CGG 3'

AA NS3-4A-1: 5' GAC CTG GAA GTC GTC GCA GCT ACC TGG GTG CTG 3'

AA NS3-4A-2: 5' CAG CAC CCA GGT AGC TGC GAC GAC TTC CAG GTC 3'
